# Supplementary material for: Cost-effectiveness analysis of malaria rapid diagnostic tests: a systematic review
Source: Infect Dis Poverty. 2019 Dec 30;8:104. doi: 10.1186/s40249-019-0615-8 (PMC6937952; doi:10.1186/s40249-019-0615-8)
Supplement: Supplementary file 1 — Additional file 1. Methodological quality of all included studies. [file 40249_2019_615_MOESM1_ESM.xlsx]

## Sheet: Sheet1
	Methodological quality of all included studies
	Study ID	Title and Abstract		Introduction	Methods														Results				Discussion	Other		Total score	Quality
		Title	Abstract	Background and objectives	Target population	Setting and location	Study perspective	Comparators	Time horizon	Discount rate	Choise of health outcomes	Measurement of effectiveness	Measurement and valuation of preference based outcomes	Estimating resources and costs	Currency, price date, and conversion	Choice of model	Assumptions	Analytical methods	Study parameters	Incremental costs and outcomes	Characterising uncertainty	Characterising heterogeneity	Study findings, limitations, generalisability, and current knowledge	Source of funding	Conflicts of interests
	Batwala 2011 [27]	Yes	Yes	No	No	Yes	Yes	No	No	No	No	Yes	unclear	No	Yes	No	Yes	No	Yes	Yes	Yes	Yes	No	Yes	Yes	13	Moderate
	Gitonga 2012 [28]	No	No	No	No	Yes	No	No	unclear	Yes	No	No	unclear	No	Yes	unclear	unclear	No	Yes	No	Yes	Yes	No	Yes	No	7	Low
	Hansen 2015 [29]	Yes	Yes	Yes	Yes	Yes	Yes	Yes	Yes	Yes	Yes	No	No	Yes	Yes	Yes	Yes	Yes	Yes	Yes	Yes	Yes	Yes	Yes	Yes	22	High
	Hansen 2017a [30]	Yes	Yes	Yes	No	Yes	No	No	Yes	No	No	No	unclear	Yes	Yes	No	Yes	Yes	Yes	Yes	Yes	unclear	Yes	Yes	Yes	15	Moderate
	Hansen 2017b [31]	Yes	No	Yes	Yes	No	No	No	Yes	No	Yes	No	unclear	Yes	Yes	No	No	Yes	No	Yes	Yes	unclear	No	Yes	Yes	12	Low
	Lemma 2011 [32]	Yes	Yes	No	Yes	Yes	Yes	No	No	No	Yes	No	unclear	Yes	No	unclear	unclear	No	Yes	No	No	unclear	Yes	Yes	Yes	11	Low
	Lubell 2007 [33]	Yes	No	No	Yes	Yes	Yes	No	No	No	Yes	No	unclear	Yes	Yes	No	No	No	Yes	Yes	No	No	No	Yes	No	10	Low
	Ly 2010 [34]	Yes	Yes	Yes	No	No	Yes	Yes	No	No	Yes	No	unclear	No	No	unclear	unclear	Yes	Yes	No	Yes	Yes	No	Yes	Yes	12	Low
	Matangila 2014 [35]	Yes	Yes	Yes	Yes	Yes	Yes	Yes	Yes	No	Yes	No	No	Yes	Yes	No	Yes	Yes	Yes	Yes	No	No	Yes	Yes	Yes	18	Moderate
	Oliveira 2010 [36]	Yes	Yes	No	Yes	Yes	No	Yes	Yes	unclear	No	unclear	unclear	Yes	Yes	unclear	No	Yes	Yes	Yes	Yes	Yes	Yes	No	Yes	15	Moderate
	Oliveira 2012 [37]	No	Yes	No	No	No	Yes	No	No	No	No	No	unclear	Yes	Yes	No	Yes	Yes	Yes	Yes	Yes	unclear	No	Yes	Yes	11	Low
	Osei-Kwakye 2013 [38]	Yes	Yes	Yes	Yes	Yes	Yes	Yes	Yes	No	Yes	No	No	Yes	No	No	Yes	Yes	Yes	Yes	Yes	No	Yes	Yes	Yes	18	Moderate
	Shillcutt 2008 [39]	Yes	Yes	No	No	Yes	No	No	No	unclear	No	unclear	No	Yes	Yes	No	Yes	No	No	No	Yes	Yes	Yes	Yes	Yes	11	Low
	Tawiah 2016 [40]	Yes	Yes	Yes	Yes	Yes	Yes	Yes	Yes	Yes	Yes	Yes	No	Yes	Yes	Yes	Yes	Yes	Yes	Yes	Yes	Yes	Yes	Yes	Yes	23	High
	Uzochukwu 2009 [41]	Yes	Yes	No	Yes	No	Yes	No	unclear	unclear	No	unclear	unclear	No	No	unclear	unclear	Yes	Yes	Yes	Yes	unclear	Yes	Yes	Yes	11	Low
